# 1 The cryptic impacts of invasion: functional 2 homogenization of tropical ant communities by 3 invasive fire ants

4

5 Mark K. L. Wong<sup>1,\*</sup>, Benoit Guénard<sup>2</sup> and Owen T. Lewis<sup>1</sup>

6 <sup>1</sup>Department of Zoology, University of Oxford, South Parks Road, Oxford OX1 3PS, UK

7 <sup>2</sup>School of Biological Sciences, The University of Hong Kong, Kadoorie Biological Sciences

8 Building, Pok Fu Lam Road, Hong Kong SAR, China

9

10 \*Author for correspondence (E-mail: [mark.wong@zoo.ox.ac.uk](mailto:mark.wong@zoo.ox.ac.uk); Tel.: +44 1865 271234)

11

## 12 **Abstract**

13 1. Invasive insects represent major threats to ecosystems, with known impacts on the  
14 taxonomic diversity of invaded communities. However, their effects on the functional  
15 dimension of biodiversity, measured as the diversity and distribution of traits, are  
16 poorly known. Such measures can determine the resilience of a community and of the  
17 ecosystem processes it modulates.

18 2. The fire ant *Solenopsis invicta* is a widespread and highly problematic invasive  
19 species. Its impacts on the taxonomic diversity of native ant communities have been  
20 widely studied, but not its impacts on their functional diversity. Comparing invaded  
21 and uninvaded plots in tropical grasslands of Hong Kong, we investigated how the  
22 presence of *S. invicta* affects the diversity and distribution of ant species and traits

23 within and across communities, the functional identities of communities, and  
24 functionally unique species.

25 3. Using a trait-probability density framework, we estimated the functional diversity of  
26 individual species, including the trait variation from intraspecific polymorphisms. We  
27 then scaled up these values to calculate functional diversity at the community level.

28 4. Invasion had only limited effects on species richness and functional richness, which  
29 were 13% and 8.5% lower in invaded communities respectively. In contrast, invasion  
30 had pronounced effects on taxonomic and functional composition due to turnover in  
31 species and trait values. Furthermore, invaded communities were functionally more  
32 homogeneous, displaying 23% less turnover and 56% more redundancy than  
33 uninvaded communities, as well as greater clustering and lower divergence in trait  
34 values. Invaded communities had fewer functionally-unique individuals and were  
35 characterized by ant species with narrower heads and bodies and shorter mandibles.

36 5. *Synthesis and applications.* Our results suggest that the full ramifications of invasions  
37 are likely to be underestimated if based solely on taxonomic measures of diversity or  
38 indices describing trait variety. Invasions by *S. invicta* led to significantly altered  
39 functional identity and increased functional homogenization of native ant  
40 communities, but only marginally lower taxonomic and functional richness.

41 Investigating the diversity and distributions of traits at species, community and  
42 landscape levels can reveal the ‘cryptic impacts’ of invasions which, despite causing  
43 little taxonomic change, may substantially modify the structure and functioning of  
44 ecological communities.

45

46 **Keywords**

47 Beta diversity, functional diversity, functional trait, functional uniqueness, insect,  
48 intraspecific, invasive species, turnover

49

## 50 **Introduction**

51 Invasions by alien species reduce native species richness, drive cascading impacts on  
52 ecosystems, cause economic damage and undermine human health (Pyšek & Richardson,  
53 2010). As with many ecological phenomena, invasions have long been studied by  
54 summarising ecological communities using metrics based on species' taxonomic identities:  
55 abundance, richness and diversity. Changes in these metrics, however, may provide only  
56 limited insight into the specific mechanisms (such as novel niches and enemy escape)  
57 underlying the causes of invasions (MacDougall, Gilbert & Levine, 2009). Furthermore, the  
58 effects of biodiversity on ecosystem processes often depend on the functions performed by  
59 the different species, rather than on species numbers and identities *per se* (Gagic et al., 2015).  
60 Summarising biodiversity in terms of the traits that directly impact organisms' ecological  
61 interactions (Functional Diversity) (McGill et al., 2006) may advance understanding of the  
62 causes and consequences of invasions.

63

64 Traits are the specific phenotypic properties of organisms which modulate their ecological  
65 interactions. The interactions of key 'functional traits' influence organism fitness and may  
66 also contribute to ecosystem functions (Wong, Guénard & Lewis, 2018). Thus, studying the  
67 diversity of functional traits in an ecological community can simultaneously reveal how  
68 biodiversity and ecosystem processes are impacted by disturbances such as invasive species.  
69 For instance, trait-based studies of plant and vertebrate communities undergoing invasion by  
70 alien species revealed declines in functional richness (the variety of trait values in individual  
71 communities) and a tendency for functional homogenization (i.e., an increased similarity in

72 trait values between communities) (Villéger, Grenouillet & Brosse, 2014; Castro-Díez et al.,  
73 2016). Crucially, invasion-driven changes in functional structure were linked to altered  
74 ecosystem functions (Castro-Díez et al., 2016).

75

76 One general limitation of earlier trait-based studies, including those on invasions, has been  
77 the exclusive use of mean trait values for species to estimate community functional diversity.  
78 This approach underestimates intraspecific trait variation, which can strongly influence  
79 community dynamics and ecosystem processes (Des Roches et al., 2018). Intraspecific trait  
80 variation has also been implicated in the success of some invasive species (González-Suárez,  
81 Bacher, & Jeschke, 2015). Recently-developed statistical tools such as the Trait Probability  
82 Density (TPD) framework can incorporate intraspecific trait variation into estimates of  
83 functional diversity (Carmona et al., 2016), but few studies have explored this within the  
84 context of invasions. Additionally, although trait-based studies are advancing understanding  
85 of invasions by plants and vertebrates, there is a shortage of similar work on invasive insect  
86 species (Wong et al., 2018), despite their ubiquity and widespread impacts on biodiversity  
87 and ecosystem services (Bradshaw et al., 2016).

88

89 Many ants, for instance, are contenders for the world's most harmful invasive species (Lowe  
90 et al., 2000). Numerous studies have documented the consequences of ant invasions for  
91 native ant communities, which include declines in species richness, taxonomic  
92 homogenization, and phylogenetic clustering (reviewed in Lessard et al., 2009). These studies  
93 focus on taxonomic and phylogenetic patterns, and rarely consider trait values directly. Few  
94 such studies document the phenotypes that were lost or gained at the community level, and  
95 none directly assessed the impacts of invasions on the functional diversity of individual  
96 communities (functional alpha diversity) or patterns across multiple communities (functional

97 beta diversity). Furthermore, no trait-based studies on ants, and few for insects in general  
98 include intraspecific trait variation in estimates of community functional diversity (Wong et  
99 al., 2018). Intraspecific trait variation is expected to be high in polymorphic species and it  
100 may influence how such species respond to or effect ecological change. Some ant species  
101 display marked variation in the body size and morphology of their worker caste (worker  
102 polymorphism), a feature which may contribute to colony fitness and ecological success  
103 (Tschinkel, 1988; Wilson, 2003). It has been observed that polymorphic ant species can  
104 surpass monomorphic ones in their abilities to collect resources varying in size, and to access  
105 environments varying in rugosity (Farji-Brener, Barrantes & Ruggiero, 2004); that is,  
106 polymorphic species may access a wider variety of niches than monomorphic species. Thus, a  
107 basic yet apparently untested assumption is that polymorphic species have higher functional  
108 (trait) richness than monomorphic species.

109

110 The Red Imported Fire Ant, *Solenopsis invicta* Buren, 1972, is native to South America but  
111 its expanding global range already encompasses five continents (Guénard et al., 2017). The  
112 species has been an extensive ecological problem throughout the United States for decades  
113 due to its strong impacts on native biodiversity at multiple trophic levels (including native  
114 ants) and the subsequent cascading effects on ecosystems (Porter & Savignano, 1990;  
115 Vinson, 1997). *Solenopsis invicta* are dietary generalists and mature colonies consist of a  
116 polymorphic worker caste (Tschinkel, 2006), a factor which, alongside their strong  
117 interspecific aggression, may contribute to the success of invasive populations (Tschinkel,  
118 1988; 2006). *Solenopsis invicta* was first reported in Taiwan in 2003, and in continental  
119 China in 2005 (Ascunce et al., 2011). In spite of their devastating impacts elsewhere, studies  
120 on the ecology of *S. invicta* invasions in Asia have been limited. Preliminary observations

121 from agrosystems in China suggest *S. invicta* invasions may be associated with declines in  
122 the species richness of arthropod communities (Wang et al., 2018).

123

124 Here, we investigate the impacts of the invasion of *S. invicta* on taxonomic and functional  
125 diversity within (alpha diversity) and between (beta diversity) native ant communities in  
126 Hong Kong. This is the first comprehensive trait-based study of an ant invasion's impact on  
127 the functional facet of biodiversity, as well as the first to incorporate polymorphisms in  
128 calculations of functional diversity at the species level.

129

130 At the scale of the individual community, we examined how invasion by *S. invicta* affected  
131 (i) species and functional richness, (ii) abundance-weighted indices of multidimensional  
132 functional diversity, and (iii) functional identity, the dominant value of a trait in the  
133 community. We predicted lower species and functional richness as well as altered functional  
134 identities in communities invaded by *S. invicta* (Porter & Savignano, 1990; Castro-Díez et al.,  
135 2016). At the multi-community (landscape) scale, we investigated how *S. invicta* invasion  
136 affected taxonomic and functional beta diversity (the dissimilarities in species and traits  
137 between communities). We predicted that invasion by *S. invicta* would lead to taxonomic  
138 homogenization (Lessard et al., 2009), which would be associated with functional  
139 homogenization, as observed for other alien taxa (Villéger et al., 2014). Using measures of  
140 species-level functional diversity, we also identified functionally unique species and  
141 compared their relative uniqueness to uninvaded and invaded communities. Lastly, we  
142 measured and compared the functional richness of different species, with the prediction that  
143 the functional richness of polymorphic species such as *S. invicta* would exceed that of  
144 monomorphic species.

145

## 146 **Materials and methods**

### 147 **Study area and sampling design**

148 Our study sites are two (<2 km apart) wetland reserves in northern Hong Kong: Lok Ma  
149 Chau (22.512°N, 114.063°E) and Mai Po (22.485°N, 114.036°E). Both reserves encompass  
150 abandoned fish farms that have since been conserved for >35 years as habitats for migratory  
151 birds. Each contains a network of bunds (width  $\leq 5$  m) which separate individual ponds (Fig.  
152 S1). The habitat is relatively homogeneous and comprises exposed grasslands with native tree  
153 species interspersed throughout. Ant communities in this landscape are comprised mostly of  
154 native species but pilot surveys from 2015 to 2017 revealed that colonies of *S. invicta* are  
155 present at high densities at multiple locations. We marked these locations, and in 2018  
156 selected a total of 61 plots, each a 4 × 4 m quadrat, to reflect two ant community types:  
157 communities with *S. invicta* absent (uninvaded; 37 plots), and those with *S. invicta* present  
158 (invaded; 24 plots). A minimum distance of 20 m between individual plots facilitated  
159 independent observations since most ant species in the region forage no further than 5 m from  
160 their nests (Eguchi, Bui & Yamane, 2004) and *S. invicta* forage within 4 m of their nests  
161 (Weeks, Wilson & Vinson, 2004). Given the homogeneity of the landscape we assumed that  
162 any community differences observed between uninvaded and invaded plots would primarily  
163 be a consequence of invasion by *S. invicta*; environmental data collected at fine spatial  
164 resolutions were used to test this assumption (see below). Sampling was conducted from  
165 April to September 2018. At each plot, six pitfall traps (55 mm in diameter) were installed to  
166 sample the ant community over 48 hours. All specimens were sorted into morphospecies and  
167 subsequently most were identified to species using taxonomic keys.

168

### 169 **Environmental data**

170 We used local GIS models (Morgan & Guénard, 2019) to obtain high-resolution data (30 ×  
171 30 m rasters) for three environmental variables corresponding to each plot: Normalized  
172 Difference Vegetation Index (NDVI), mean annual temperature, and mean annual  
173 precipitation.

174

### 175 **Assembling the individual-level trait dataset**

176 Here we aimed to obtain values of functional diversity that incorporated intraspecific trait  
177 variation, including the variation arising from worker polymorphisms. We assembled an  
178 individual-level trait dataset comprising data for seven morphological traits that regulate ant  
179 physiology and behaviour and that are hypothesized to impact performance and fitness (Table  
180 1). Using mounted specimens from the pitfall traps and a Leica M165c stereo microscope  
181 paired with Leica Application Suite software, we recorded high-resolution images and  
182 performed trait measurements on at least 10 individual workers of every species (N=319).  
183 For dimorphic species of *Camponotus* and *Pheidole* where workers comprise two distinct  
184 sub-castes (minors and majors), we included trait data for individuals of both sub-castes  
185 based on the relative proportions (i.e., ratio of minors to majors) observed in natural colonies  
186 (Passera, 1984; Wilson, 2003). The invader *S. invicta* has a polymorphic worker caste, and  
187 Tschinkel (1988) showed that this polymorphism is mainly expressed in the morphological  
188 variation displayed by the ‘majors’ (head width >0.7 mm), which are present only in mature  
189 colonies where they comprise 35% of the worker population; ‘minors’ of head width <0.7  
190 mm comprise the remaining 65% in mature colonies and juvenile colonies only consist of  
191 minors. We observed that all invaded plots contained majors (head width >0.7 mm),  
192 suggesting they were mature colonies; thus, our trait data for *S. invicta* (n=20) included both  
193 minors (65% of individuals) and majors (35% of individuals).

194



195 Table 1. The seven traits measured on each individual, and each trait's hypothesized links to  
 196 the performance and fitness of ants.

| <b>Trait</b>           | <b>Measurement</b>                                        | <b>Hypothesized link to performance and fitness</b>                                                                                                                                                 |
|------------------------|-----------------------------------------------------------|-----------------------------------------------------------------------------------------------------------------------------------------------------------------------------------------------------|
| <i>size</i>            | Weber's length:<br>diagonal length of<br>mesosoma         | Modulates vital and physiological rates,<br>determines physical constraints and exposure to<br>predators, influences resource type and<br>acquisition efficiency (Silva & Brandão, 2010).           |
| <i>head width</i>      | Width of head<br>including eyes                           | Determines the size of gaps through which an<br>individual can pass (Schofield, Bishop & Parr,<br>2016) and the volume of muscles powering the<br>mandibles during foraging (Richter et al., 2019). |
| <i>eye width</i>       | Width of left eye                                         | Determines ability in navigation, foraging,<br>predator and prey detection, and indicative of<br>activity times (Silva & Brandão, 2010).                                                            |
| <i>mandible length</i> | Length of left<br>mandible                                | Responds to selection on diet type and<br>specialization (Silva & Brandão, 2010).                                                                                                                   |
| <i>scape length</i>    | Length of scape of<br>left antenna                        | Responds to selection on navigation and sensory<br>abilities (Silva & Brandão, 2010).                                                                                                               |
| <i>pronotum width</i>  | Width of pronotum                                         | Determines volume of muscles for head-support<br>and load-bearing (Keller et al., 2014).                                                                                                            |
| <i>leg length</i>      | Combined length of<br>femur and tibia of left<br>hind leg | Determines mobility; leg length influences<br>running speed, which affects success in foraging<br>or escape from predators (Grevé et al., 2019).                                                    |

197

### 198 **Compressing trait variation**

199 We divided the measurements of six traits (*head width, eye width, mandible length, scape*  
 200 *length, pronotum width* and *leg length*) by *size* to reduce correlation with body size. We then  
 201 log-transformed the values of all seven traits to reduce the influence of extreme values, and  
 202 standardized trait values to have mean of zero and unit variance. Next, we used Principal

203 Components Analysis (PCA) to synthesize the major axes of variation in multidimensional  
204 trait space and to reduce the number of dimensions used to calculate functional diversity  
205 indices. We performed the PCA using the mean trait values of each species and subsequently  
206 predicted the values of the PCA components for all individuals in the dataset. We used  
207 species means instead of individual trait values in the PCA because using the latter could bias  
208 the analysis if some species had disproportionately large numbers of individuals in the  
209 dataset. We retained the first two components of the PCA, which had eigenvalues greater  
210 than unity, and which captured 76.9% of the total variance in traits. We then predicted the  
211 values of these two components for every individual in the trait dataset and used these new  
212 ‘traits’ to calculate functional diversity indices.

213

#### 214 **Functional diversity from species to communities**

215 All functional diversity indices were calculated using the Trait Probability Density  
216 framework which incorporates intraspecific variation, the multidimensional nature of traits,  
217 species abundances, and probabilistic trait distributions (see Carmona et al., 2016). First, we  
218 used multidimensional probability density functions to calculate trait probability distributions  
219 (which reflect the probabilities of observing different trait values) at the level of individual  
220 species (TPDsp). Next, we scaled up TPDsp to local community levels (TPDcom) by  
221 summing the TPDsp of all species in each local ant community, weighted by their relative  
222 abundances – which we estimated as frequencies of occurrence. Finally, five different indices  
223 for functional diversity were calculated using each community’s TPDcom. The indices were  
224 Functional Richness (FRic), the volume of functional space occupied by the community;  
225 Functional Evenness (FEve), the regularity of the distribution of abundance in functional  
226 space; Functional Divergence (FDiv), a measure of how abundances tend to be on the outer  
227 margins of the functional space while controlling for functional richness; Rao, the

228 abundance-weighted dispersion of individuals (or species) in functional space; and  
229 Functional Redundancy (FRed), the degree to which trait values are represented by multiple  
230 species in the community (Carmona et al., 2016). We used this multi-index approach to  
231 measure functional diversity because no one index can encapsulate the independent  
232 components of functional diversity (Mouchet et al., 2010). In addition to calculating the  
233 observed values of the functional diversity indices, we calculated Standardized Effect Size  
234 (SES) values for all indices so as to estimate community-level functional diversity that had  
235 been corrected for potential effects of species richness (Swenson, 2014). SES values were  
236 calculated by comparing the observed values to values generated from 999 constrained null  
237 models randomizing the community data matrix using the “Independent Swap” algorithm.  
238 The formula for calculating SES is:

$$239 \text{SES} = (\text{Mean}_{\text{observed}} - \text{Mean}_{\text{null}}) / \text{s.d.}_{\text{null}}$$

240

### 241 **Functional identity**

242 To estimate functional identity, we calculated the community-weighted mean (CWM) for  
243 each trait in every local ant community. A CWM reflects the dominant value of a given trait  
244 in a given community (Swenson, 2014). We calculated CWMs using mean trait values of  
245 species weighted according to their relative abundances in the different communities. Size-  
246 correction was applied to all traits except *size* (see above).

247

### 248 **Taxonomic and functional beta diversity**

249 We calculated six pairwise measures of taxonomic and functional beta diversity for all  
250 possible pairs of local ant communities. We used matrices of species' abundances to calculate  
251 the Taxonomic Dissimilarity between each pair, and further decomposed this into Taxonomic  
252 Turnover (dissimilarities arising from the replacement of species between communities), and

253 Taxonomic Nestedness (dissimilarities in the relative abundances of species that occurred in  
254 both communities). We calculated the Functional Dissimilarity between paired communities  
255 using their TPDcom, and further decomposed this into Functional Turnover (dissimilarities in  
256 the trait values between communities), and Functional Nestedness (dissimilarities in the  
257 relative abundances of trait values shared between communities). In addition to observed  
258 values, we calculated SES values (from comparisons with 999 constrained null models using  
259 the “Independent Swap” algorithm) for all components of functional beta diversity. Although  
260 the “Independent Swap” algorithm may not be optimal for generating null models of beta  
261 diversity patterns shaped by dispersal limitation (Swenson, 2014), this is unlikely to be a  
262 problem for the present study because all species disperse by flying alates that can travel  
263 distances exceeding the scale of the study landscape (the maximum distance between any two  
264 plots was 4 km).

265

### 266 **Species’ functional richness and functional uniqueness**

267 We calculated functional richness and functional uniqueness values for all species.  
268 Functional richness was calculated based on each species’ trait probability distribution  
269 (TPDsp) (Carmona et al., 2016). Species’ functional uniqueness values were calculated  
270 relative to individual local communities, based on the degree to which a species’ functional  
271 space (TPDsp) did not overlap with a local community’s functional space (TPDcom)  
272 (Carmona et al., 2016). We calculated each species’ ‘relative uniqueness’ with respect to the  
273 different uninvaded and invaded communities, as well as its ‘objective uniqueness’ in the  
274 species pool (using a hypothetical community containing all species at equal abundance).

275

### 276 **Statistical analysis**

277 *Taxonomic alpha diversity, functional diversity and CWMs*

278 We used separate linear mixed-effects models to assess whether the values of alpha  
279 taxonomic diversity, functional diversity indices (including observed and SES values) and  
280 CWMs differed significantly between uninvaded and invaded local ant communities, while  
281 including a random effect of environmental variation that was captured in the first component  
282 of a PCA for the three environmental variables, which had eigenvalues greater than unity.

### 283 *Taxonomic and functional beta diversity*

284 We used non-metric multidimensional scaling (NMDS) to scrutinize the relationships  
285 between and among invaded and uninvaded local ant communities in multidimensional space  
286 (Fig. S2). We used PERMANOVA (9,999 permutations) to quantify dissimilarity, turnover  
287 and nestedness between the observed taxonomic and functional compositions of uninvaded  
288 and invaded communities. We used permutation tests for multivariate dispersions to assess  
289 whether the levels of taxonomic and functional beta diversity (in three components) observed  
290 among uninvaded communities differed from those observed among invaded communities.

291 We also used nonparametric Mann-Whitney U tests to compare SES values of the three  
292 functional beta diversity components between uninvaded and invaded communities.

### 293 *Functional uniqueness of individual species*

294 We calculated each species' average relative uniqueness to uninvaded and invaded  
295 communities and regressed these against its objective uniqueness in a linear model.

### 296 *Software*

297 We used the following packages in R software version 3.3.3 (R Core Team, 2017): *TPD*  
298 (Carmona, 2018) for calculating trait probability distributions, functional diversity indices,  
299 functional dissimilarity and functional uniqueness measures, *FD* (Laliberté, Legendre &  
300 Shipley, 2014) for calculating CWMs, *betapart* (Baselga et al., 2018) for beta diversity  
301 analyses, *lme4* (Bates et al., 2015) for linear mixed-effects models, *MASS* (Venables &  
302 Ripley, 2002) for NMDS, and *ggplot2* (Wickham, 2009) for the production of graphics.

303

## 304 **Results**

### 305 **Community composition and species richness**

306 A total of 29 ant species (including *S. invicta*) were collected from 366 pitfall traps in 37  
307 uninvaded plots and 24 invaded plots (Table S1). The species composition across invaded  
308 and uninvaded communities was similar overall, with 27 of the 28 native species occurring in  
309 both community types, and only one species not found in invaded communities. On average,  
310 the species richness of invaded communities was marginally and non-significantly lower (by  
311 13%) than that of uninvaded communities (Table 2; Fig. 1).

312

### 313 **Functional diversity and CWMs**

314 Uninvaded and invaded communities had similar levels of FRic and FEve for both observed  
315 and SES values. However, in linear mixed-effects models, the observed FDiv and Rao of  
316 invaded communities were significantly lower than those of uninvaded communities by 11%  
317 and 7% respectively, and the FRed of invaded communities was significantly higher than that  
318 of uninvaded communities by 56% (Table 2; Fig. 1); similar relationships were observed for  
319 SES values. CWMs for the traits *size*, *scape length*, *eye width* and *leg length* did not differ  
320 significantly between uninvaded and invaded communities. By contrast, the CWMs for *head*  
321 *width*, *pronotum width* and *mandible length* were significantly smaller (by 4–7%) in the  
322 invaded communities (Table 2; Fig. 2).

323

### 324 **Taxonomic and functional beta diversity**

325 Uninvaded and invaded communities were significantly dissimilar in both taxonomic and  
326 functional composition, and these dissimilarities were driven by turnover in species as well as  
327 trait values (Table 3; Fig. 3). The observed levels of total taxonomic and functional

328 dissimilarities among both uninvaded and invaded communities were comparable (Table 4),  
329 but SES values revealed that total functional dissimilarity was lower among invaded  
330 communities when corrected for species richness (Mann-Whitney U test:  $P < 0.001$ ) (Fig. 3).  
331 Invaded communities had significantly lower levels of functional turnover (by 23%) and  
332 higher functional nestedness (by 20%) in observed values; these relationships were  
333 maintained in SES values (Mann-Whitney U tests:  $P < 0.001$ ) (Table 4). Likewise, invaded  
334 communities were significantly more taxonomically nested than uninvaded communities (by  
335 42%, Table 4; Fig. 3). That is, in comparison to uninvaded communities, relatively greater  
336 proportions of the total taxonomic and functional dissimilarities among invaded communities  
337 were driven by losses of species than by replacements of species, and by changes in the  
338 abundances of trait values than by changes in the trait values themselves, respectively.

339

#### 340 **Species' functional richness and functional uniqueness**

341 Functional richness varied over four-fold among species (Min. = 0.86, Max. = 3.61) (Fig. 4).  
342 The four most functionally-rich species were two dimorphic species of *Camponotus*, another  
343 dimorphic species, *Pheidole nodus*, followed by the polymorphic invader *S. invicta*. In  
344 separate linear regressions, species' relative uniqueness to both uninvaded and invaded  
345 communities increased with their objective uniqueness (Fig. 5). However, there was  
346 relatively more overlap between the functional spaces of less unique species and the  
347 functional spaces of invaded communities (Intercept<sub>Invaded</sub> = -0.15; Intercept<sub>Uninvaded</sub> = 0.45).  
348 Furthermore, the relative uniqueness of species to invaded communities increased more  
349 steeply with an increase in objective uniqueness (Slope<sub>Invaded</sub> = 1.17; Slope<sub>Uninvaded</sub> = 0.52), such that  
350 very unique species were more unique to invaded communities than to uninvaded  
351 communities (Fig. 5).

352

353

354 Table 2. Summary statistics for response variables in separate linear mixed-effects models

355 with community type (uninvaded vs. invaded) as fixed effects and environmental variation as

356 a random effect.

| <b>Index</b>     | <b>Uninvaded<br/>(mean ± SE)</b> | <b>Invaded<br/>(mean ± SE)</b> | <b><math>\chi^2</math></b> | <b>df</b> | <b>P</b>  |
|------------------|----------------------------------|--------------------------------|----------------------------|-----------|-----------|
| Species Richness | 8.97 ± 0.42                      | 7.80 ± 0.67                    | 3.06                       | 1         | 0.08      |
| FRic             | 14.1 ± 0.61                      | 12.9 ± 0.97                    | 1.59                       | 1         | 0.21      |
| FRic.SES         | -0.008 ± 0.15                    | 0.22 ± 0.24                    | 0.86                       | 1         | 0.35      |
| FEve             | 0.60 ± 0.007                     | 0.59 ± 0.01                    | 0.24                       | 1         | 0.62      |
| FEve.SES         | 0.14 ± 0.16                      | -0.09 ± 0.26                   | 0.83                       | 1         | 0.36      |
| FDiv             | 0.73 ± 0.01                      | 0.65 ± 0.02                    | 17.8                       | 1         | <0.001*** |
| FDiv.SES         | 0.61 ± 0.15                      | -0.46 ± 0.24                   | 20.7                       | 1         | <0.001*** |
| Rao              | 0.82 ± 0.01                      | 0.76 ± 0.02                    | 7.97                       | 1         | <0.01**   |
| Rao.SES          | 0.44 ± 0.13                      | -0.42 ± 0.2                    | 18.0                       | 1         | <0.001*** |
| FRed             | 0.34 ± 0.05                      | 0.53 ± 0.07                    | 13.8                       | 1         | <0.01**   |
| FRed.SES         | -0.48 ± 0.13                     | 0.55 ± 0.21                    | 23.9                       | 1         | <0.001*** |
| CWMhead          | 0.76 ± 0.005                     | 0.72 ± 0.007                   | 23.7                       | 1         | <0.001*** |
| CWMpron          | 0.52 ± 0.003                     | 0.48 ± 0.004                   | 85.8                       | 1         | <0.001*** |
| CWMmand          | 0.42 ± 0.003                     | 0.40 ± 0.005                   | 10.1                       | 1         | <0.01**   |

357

358



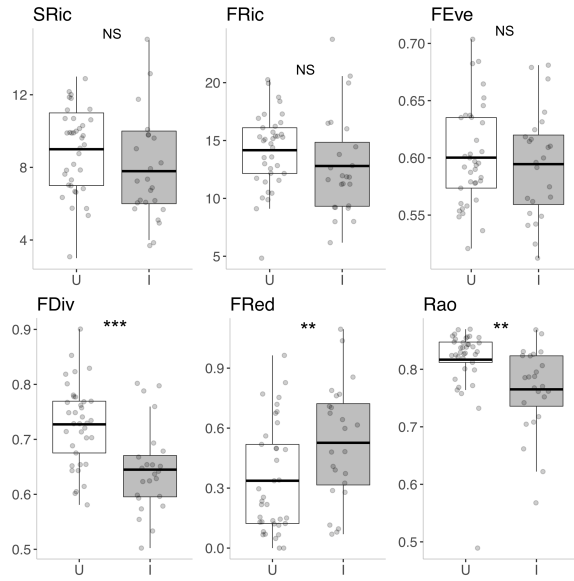

359

360 **Figure 1.** Boxplots showing species richness and observed values of five functional diversity

361 indices in 37 uninvaded and 24 invaded local communities. Dots show values of individual

362 communities, thick bars show means, boxes show inter-quartile range and vertical lines

363 extend to maximum and minimum values (excluding outliers). Asterisks indicate statistical

364 significance (\*\*\*  $P < 0.001$ , \*\*  $P < 0.01$ , \*  $P < 0.05$ , NS, not significant).

365

366

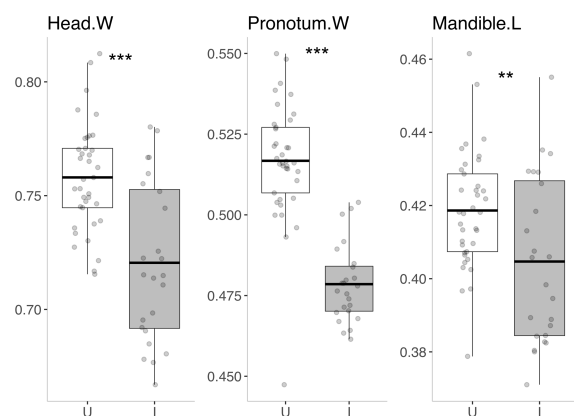

367

368 **Figure 2.** Boxplots displaying community-weighted mean values for size-corrected *head*

369 *width*, *pronotum width* and *mandible length* in 37 uninvaded and 24 invaded communities.

370 Dots show values of individual local communities, thick bars show mean values, box edges

371 show standard deviations, and vertical lines extend towards minimum and maximum values.

372 Asterisks indicate statistical significance (\*\*\*  $P < 0.001$ , \*\*  $P < 0.01$ ).

373

374

375 Table 3. Results of PERMANOVA tests for dissimilarities between uninvaded and invaded

376 communities in their observed taxonomic and functional compositions.

| Beta diversity | Component           | F    | R <sup>2</sup> | P         |
|----------------|---------------------|------|----------------|-----------|
| Taxonomic      | Total Dissimilarity | 22.4 | 0.28           | <0.001*** |
|                | Turnover            | 31.9 | 0.35           | <0.001*** |
|                | Nestedness          | 13.6 | 0.31           | 1.0       |
| Functional     | Total Dissimilarity | 33.1 | 0.36           | <0.001*** |
|                | Turnover            | 32.7 | 0.36           | <0.001*** |
|                | Nestedness          | 14.7 | 0.33           | 1.0       |

377

378

379 Table 4. Permutation tests for multivariate dispersions, with calculations based on the

380 average distances to centroids of uninvaded and invaded communities for different

381 components of taxonomic and functional beta diversity. These tests compare the levels of

382 beta diversity observed among uninvaded communities to those observed among invaded

383 communities.

| Beta diversity | Component           | Uninvaded | Invaded | F    | P       |
|----------------|---------------------|-----------|---------|------|---------|
| Taxonomic      | Total Dissimilarity | 0.35      | 0.36    | 0.10 | 0.77    |
|                | Turnover            | 0.29      | 0.28    | 0.20 | 0.66    |
|                | Nestedness          | 0.07      | 0.10    | 5.89 | 0.02*   |
| Functional     | Total Dissimilarity | 0.32      | 0.31    | 0.01 | 0.91    |
|                | Turnover            | 0.30      | 0.23    | 5.01 | 0.03*   |
|                | Nestedness          | 0.41      | 0.49    | 7.37 | <0.01** |

384

385

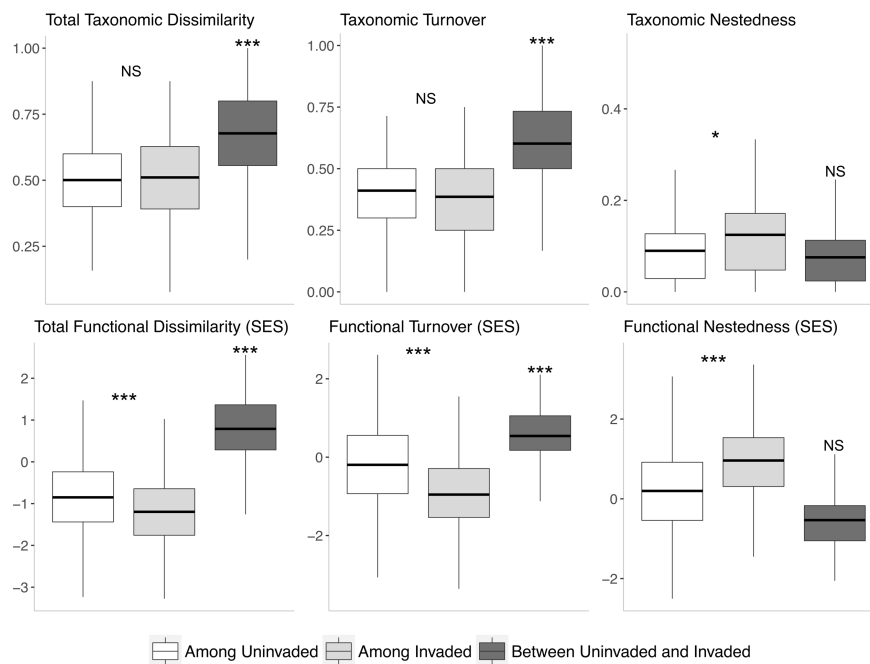

386

387 **Figure 3.** Observed levels of taxonomic beta diversity and functional beta diversity corrected

388 for species-richness (SES values) in three measures of dissimilarity (Total, Turnover, and

389 Nestedness). Boxplots show values among uninvaded communities, among invaded

390 communities, and between uninvaded and invaded communities. Asterisks indicate statistical

391 significance (\*\*\*  $P < 0.001$ , \*  $P < 0.05$ , NS, not significant).

392

393

394

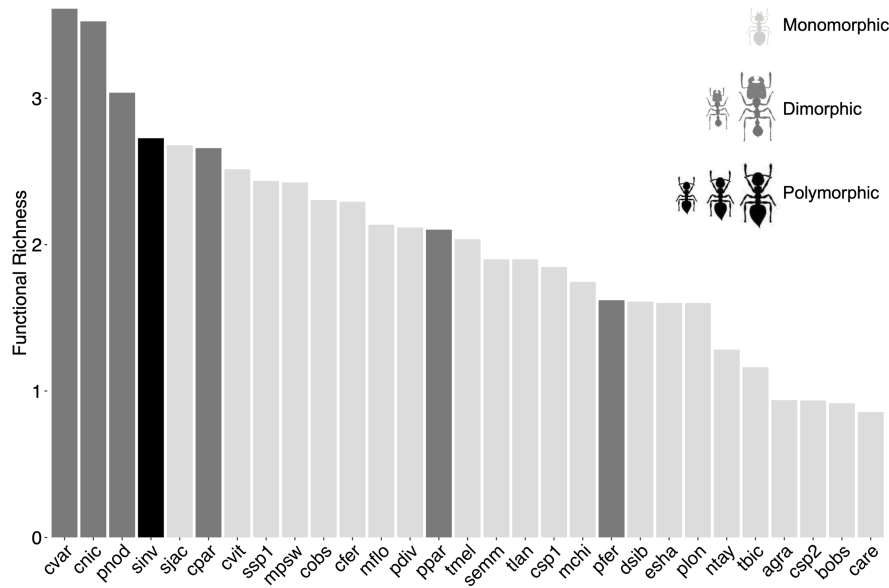

395

396 **Figure 4.** Functional richness of ant species with three different degrees of polymorphism.

397 Bars show values for 22 monomorphic species (light grey), six dimorphic species (dark grey),

398 and the polymorphic species *S. invicta* (black). Full species names are listed in Table S1, and

399 images of monomorphic, dimorphic and polymorphic species are shown in Fig. S4.

400

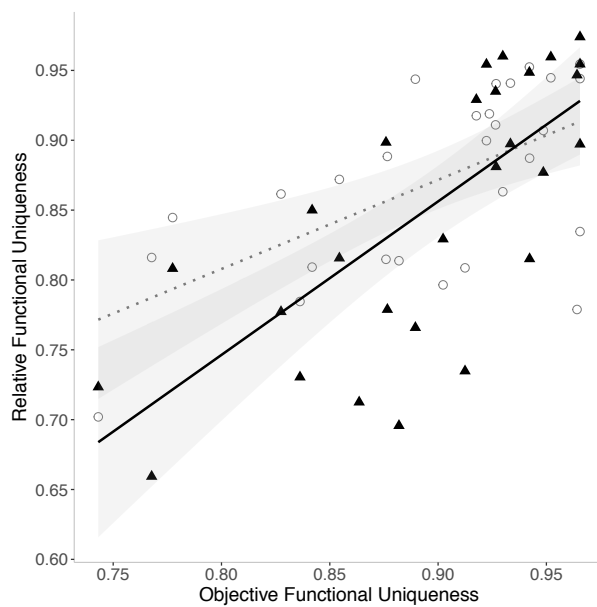

401

402 **Figure 5.** Species' relative functional uniqueness to local communities that were uninvaded

403 (grey dotted line; circles) and invaded (black solid line; triangles) plotted against their

404 objective functional uniqueness in the species pool.

405

## 406 **Discussion**

407 Most concerns surrounding biological invasions cite declines in the species richness of  
408 invaded communities. However, invasions can also impact the structure and function of  
409 ecological communities in ways that are less detectable with taxonomic measures of  
410 diversity. Here we investigated the impacts of an invasion on the diversity and distribution of  
411 species and traits in individual communities (alpha diversity) and across multiple  
412 communities (beta diversity). We found that invasion by *S. invicta*, one of “the world’s worst  
413 invasive species” (Lowe et al., 2000), led to the functional homogenization and altered  
414 functional identity of ant communities in Hong Kong despite effecting marginal changes in  
415 species and functional richness. Additionally, we observed higher functional richness in  
416 polymorphic species than monomorphic species. We discuss the possible ecological drivers  
417 and ecosystem implications of our findings below.

418

### 419 **Polymorphic species are more functionally rich**

420 Polymorphisms are among the most conspicuous and pervasive sources of intraspecific trait  
421 variation (Ford, 1957). It is conceivable that polymorphic species, with greater variation in  
422 morphology, would display higher functional richness. We generally found this to be the case  
423 among the 29 ant species studied. Dimorphic species of the genera *Camponotus* and *Pheidole*  
424 and the polymorphic *S. invicta* displayed 2–322% more functional richness than  
425 monomorphic species (Fig. 4). However, the functional richness of three dimorphic species  
426 was higher than that of the polymorphic *S. invicta*. This likely resulted from the pronounced  
427 allometry of the discrete major subcastes of dimorphic species, which generated extreme trait  
428 values; polymorphic *S. invicta* workers, by contrast, display a continuous variation with size  
429 (Figs. 4 and S4). While it is unlikely that the morphological traits measured were

430 representative of all species' multidimensional niches, our findings demonstrate that, at least  
431 across multiple aspects of morphology linked to foraging, mobility and physiology (Table 1),  
432 polymorphic species occupy more functional space and may have access to a greater variety  
433 of niches than monomorphic species, as previously suggested (Farji-Brener et al., 2004).  
434 Future work investigating whether functional richness predicts niche variety or specialisation  
435 across polymorphic and monomorphic species could further our understanding of how  
436 species and ecosystem processes respond to ecological change.

437

#### 438 **Lower species and functional richness in invaded communities**

439 Disturbances drive local extinctions by decreasing the abundances of particular species with  
440 vulnerable trait combinations; this process can initially occur without significantly modifying  
441 community composition or affecting total species and functional richness (Mouillot et al.,  
442 2013). Invasions by *S. invicta* in Hong Kong generally follow these patterns. Two thirds of  
443 the native species had lower abundances in the invaded communities (Fig. S3), but the same  
444 communities displayed only marginally lower species richness (by 13%) and functional  
445 richness (by 8.5%) (Table 2 and Fig. 1). These results differ from previously reported  
446 extensive declines (by 69%) in the species richness of ant communities invaded by *S. invicta*  
447 in North America (Porter & Savignano, 1990). The current absence of an extensive decline in  
448 species richness may be associated with the relatively younger *S. invicta* invasion in Hong  
449 Kong (Ascunce et al., 2011), and potentially the ecological differences (and thus responses)  
450 between the tropical grassland ant communities studied here, which comprised many  
451 disturbance specialists, and the ant communities of temperate forests in previous studies  
452 (Porter & Savignano, 1990). Aside from the marginal differences in species and functional  
453 richness, multiple indices sensitive to changes in the abundance and distribution of trait  
454 values differed significantly between uninvaded and invaded communities (Table 2: CWMs,

455 FDiv, Rao, and FRed). Although each index measures a unique aspect of functional identity  
456 and diversity (Mouchet et al., 2010), the results collectively indicate that invasions by *S.*  
457 *invicta* exert a non-random selection on native communities through the trait values of  
458 individuals; we discuss these patterns in the two sections that follow.

459

#### 460 **Altered functional identity of invaded communities**

461 The CWMs for size-corrected *head width*, *pronotum width* and *mandible length* of ants in  
462 invaded communities decreased significantly by 4–7% (Fig. 1), in line with our hypothesis  
463 that invasion would alter communities' functional identities. The results suggest that invasion  
464 selects for individuals with narrower heads and pronotums and shorter mandibles. One  
465 hypothesis is that the observed patterns relate to mobility. It has been shown that the width of  
466 an ant's head and pronotum determine the size of gaps through which it can pass (Schofield  
467 et al., 2016). Narrower heads and pronotums of ants in invaded communities could thus  
468 reflect demands for moving through tighter spaces to avoid the behaviourally dominant *S.*  
469 *invicta* during foraging (Tschinkel, 2006) or to reach resources in less accessible locations.  
470 For instance, studies on other ant invasions reported that native hypogaecic species,  
471 specialised to forage and move through soil, increased in relative abundance by 50% (Human  
472 & Gordon, 1997). A second hypothesis relates to diet. In ants, long mandibles of many  
473 predatory species are specialized adaptations for prey capture (Silva & Brandão, 2010), and  
474 larger heads and pronotums afford more space for the musculature powering snapping,  
475 gripping and load-bearing abilities (Keller et al., 2014; Richter et al., 2019). Hence, the  
476 shorter mandibles and narrower heads and pronotums of ants in invaded communities may  
477 reflect a less specialized or more herbivorous diet. Such ants may use more liquid foods (e.g.,  
478 honeydew from hemipterans) that can be ingested relatively quickly, and which require less  
479 manipulation (capture, ripping, transport) than solid foods. The presence of the behaviourally

480 dominant *S. invicta* may select for ants that ‘grab and go’ over those which remain at food  
481 sources for longer periods.

482

### 483 **Functional clustering and redundancy of invaded communities**

484 In invaded communities, values of FDiv and Rao decreased significantly by 11% and 7 %  
485 respectively, while FRed increased significantly by 56% (Fig. 2). These patterns arose due to  
486 the presence of more individuals with similar trait values in invaded communities.  
487 Specifically, FDiv reflects the degree to which the distribution of species’ abundances in  
488 functional space maximizes total community variation in trait values (and niches) (Mouchet  
489 et al., 2010). Hence, the results suggest that the most abundant species in uninvaded  
490 communities are more differentiated in their niches (higher FDiv), while those in invaded  
491 communities have more similar niches (lower FDiv). As observed for FDiv, the lower Rao in  
492 invaded communities is indicative of niche clustering (species’ abundances are relatively  
493 more clustered in functional space) (Mouchet et al., 2010). FRed reflects the degree to which  
494 specific trait values are represented by multiple species in the community (Carmona et al.,  
495 2016). In uninvaded communities (lower FRed) fewer species share the same trait values,  
496 suggesting less niche overlap. By contrast, more species share the same trait values in  
497 invaded communities (higher FRed), suggesting more niche overlap. Therefore, as observed  
498 for the CWMs, the results for FDiv, Rao and FRed show a general pattern of species’  
499 abundances converging towards particular trait values in invaded communities, which is one  
500 signature of selection (Vellend, 2016).

501

### 502 **Functional homogenization across invaded communities**

503 Our analysis of functional alpha diversity suggests that *S. invicta* invasions are associated  
504 with a selection for specific trait values in individual communities. Because such selection



505 has repeated over separate communities invaded by *S. invicta*, functional beta diversity  
506 patterns across multiple communities show a trend towards functional homogenization. This  
507 is evident from the significantly lower functional dissimilarity among communities where *S.*  
508 *invicta* is present (Fig. 3). Contrary to our hypothesis, however, functional turnover did not  
509 track taxonomic turnover; changes in the species found in different invaded communities  
510 were not matched proportionately by changes in those communities' trait values. The invaded  
511 communities actually retained similar levels of taxonomic turnover to uninvaded  
512 communities (Fig. 3). However, the former displayed significantly less functional turnover in  
513 observed structure (by 23%; Table 4), as well as in SES values of functional beta diversity  
514 corrected for the effects of species richness (Fig. 3). In previous analyses using computer  
515 simulations, such patterns of low functional turnover amid higher taxonomic turnover were  
516 predicted to emerge most frequently when there are high levels of functional redundancy in  
517 individual communities (Baiser & Lockwood, 2011). Given that communities invaded by *S.*  
518 *invicta* displayed 56% more functional redundancy than uninvaded communities (Fig. 2), our  
519 observations in an invasion context provide empirical support for the theoretical predictions  
520 (Baiser & Lockwood, 2011).

521

## 522 **Functionally ordinary winners and functionally unique losers across invaded** 523 **communities**

524 Invasions and other disturbances can result in losses of functionally unique species before  
525 functionally redundant species (Flynn et al., 2009). Thus, examining the abundance and  
526 distribution of functionally unique species may promote the advanced detection of invasion  
527 impacts. Previous studies used trait patterns of aggregated communities to define functionally  
528 unique groups or species, then analysed their abundances within each community (e.g.,  
529 Coetzee & Chown, 2016). A species' functional uniqueness, however, is a relative property,

530 dependent on the value and abundance of other traits present in the particular community.  
531 Thus, also measuring species' functional uniqueness as *relative to specific communities* may  
532 improve the understanding of changes in functional space and how shifting species  
533 abundances contribute to these changes. Here we first assigned each species an objective  
534 value of functional uniqueness in the species pool using a community containing all species  
535 at equal abundance. We then validated this measure by showing that objectively unique  
536 species were on the whole more unique than others across different uninvaded and invaded  
537 communities (Fig. 5: positive linear relationships for both lines). Next, we found that  
538 objectively non-unique (functionally ordinary) species constituted more of the functional  
539 spaces of invaded communities than uninvaded communities (Fig. 5: lower intercept of the  
540 'invaded' line). We further found that objectively very-unique species constituted less of the  
541 functional spaces of invaded communities than uninvaded communities (Fig. 5: steeper slope  
542 of 'invaded' line). Together, these findings suggest that the *S. invicta* invasion has led to  
543 invaded communities becoming more comprised of a subset of species (winners) sharing trait  
544 values which are common in the species pool, and less comprised of other species (losers)  
545 with trait values that are rare in the species pool. These patterns mirror the decline of  
546 functionally unique species before functionally redundant species observed in other  
547 disturbances (Flynn et al., 2009).

548

#### 549 **Implications for ecosystem function**

550 The consequences of an invasion will extend to the ecosystem if the affected taxa are also  
551 key modulators of ecosystem functions. Ants are such organisms, and the effects of *S. invicta*  
552 invasion on various ant-modulated ecosystem functions such as predation, nutrient cycling  
553 and bioturbation is a pertinent question to tackle in future research. These effects will hinge  
554 on the particular relationships between ant diversity and ant-modulated ecosystem functions

555 in the tropical grassland communities of Hong Kong. For instance, if ecosystem functions  
556 mainly respond to the functional identities of the ant communities (i.e., selection effects),  
557 they may be impacted significantly by the altered CWMs of invaded communities.  
558 Alternatively, functional homogenization and the decline of functionally unique species in  
559 invaded communities could impact ecosystem functions driven by functional  
560 complementarity. Ecosystem functions may also respond to both functional identity and  
561 complementarity across different spatial and temporal scales (Isbell et al., 2018). Whatever  
562 the case, the present findings show *S. invicta* invasions in Hong Kong to have significant  
563 impacts on the functional structure of ant communities, which may also affect ecosystem-  
564 wide changes.

565

#### 566 **Implications for understanding and managing invasions**

567 Using data on the traits of individuals we have shown that an alien invasive species alters – in  
568 a selective, non-random manner – the functional properties of native communities that may  
569 influence ecosystem processes. Crucially, our findings further suggest that such impacts may  
570 unfold in the absence of similar changes in both taxonomic and functional richness. Thus,  
571 assessments exclusively using taxonomic measures of diversity, or indices that only describe  
572 trait variety, may fail to detect various consequences of invasions for the structure and  
573 function of ecological communities. These other ecologically significant consequences of  
574 invasion (e.g., functional clustering and homogenization) can be uncovered by investigating  
575 patterns in the diversity and distribution of traits at the species, community, and landscape  
576 levels. Future work using such comprehensive functional approaches may not only improve  
577 the management of invasive species, but also help to identify other alien species driving  
578 ‘cryptic impacts’ on ecosystem-relevant community structure amid modest taxonomic  
579 change.

580

## 581 **Authors' Contributions**

582 M.K.L.W., B.G. and O.T.L. designed the study. M.K.L.W. conducted fieldwork, analysed the  
583 data and wrote the first draft of the manuscript. All authors contributed substantially to  
584 manuscript revisions.

585

## 586 **Acknowledgements**

587 We are grateful to Brett Morgan for providing access to environmental data, Mac Pierce,  
588 Roger Lee and Roy Cheung for field assistance, Carlos Carmona for help with *TPD*, and staff  
589 of AEC and WWF Hong Kong for logistical support. This work was supported by a National  
590 Geographic Grant (60-16) and a University of Oxford Clarendon Scholarship to M.K.L.W.

591

## 592 **References**

593 Ascunce, M. S., Yang, C. C., Oakey, J., Calcaterra, L., Wu, W. J., Shih, C. J., ... &  
594 Shoemaker, D. (2011). Global invasion history of the fire ant *Solenopsis invicta*. *Science*,  
595 331, 1066-1068.

596

597 Baiser, B., & Lockwood, J. L. (2011). The relationship between functional and taxonomic  
598 homogenization. *Global Ecology and Biogeography*, 20, 134-144.

599

600 Baselga, A., Orme, D., Villeger, S., De Bortoli, J., & Leprieux, F. (2018). betapart:  
601 partitioning beta diversity into turnover and nestedness components. R package version 1.5.1.

602

- 603 Bates, D., Maechler, M., Bolker, B., & Walker, S. (2015). Fitting linear mixed-effects models  
604 using lme4. *Journal of Statistical Software*, 67, 1-48.  
605
- 606 Bradshaw, C. J., Leroy, B., Bellard, C., Roiz, D., Albert, C., Fournier, A., ... & Courchamp,  
607 F. (2016). Massive yet grossly underestimated global costs of invasive insects. *Nature*  
608 *Communications*, 7, 12986.  
609
- 610 Carmona, C. P., de Bello, F., Mason, N. W., & Lepš, J. (2016). Traits without borders:  
611 integrating functional diversity across scales. *Trends in Ecology and Evolution*, 31, 382-394.  
612
- 613 Carmona, C. P. (2018). TPD: methods for measuring functional diversity based on trait  
614 probability density. R package version 1.0.0.  
615
- 616 Castro-Díez, P., Pauchard, A., Traveset, A., & Vilà, M. (2016). Linking the impacts of plant  
617 invasion on community functional structure and ecosystem properties. *Journal of Vegetation*  
618 *Science*, 27, 1233-1242.  
619
- 620 Coetzee, B. W., & Chown, S. L. (2016). Land-use change promotes avian diversity at the  
621 expense of species with unique traits. *Ecology and Evolution*, 6(21), 7610-7622.  
622
- 623 Des Roches, S., Post, D. M., Turley, N. E., Bailey, J. K., Hendry, A. P., Kinnison, M. T., ... &  
624 Palkovacs, E. P. (2018). The ecological importance of intraspecific variation. *Nature Ecology*  
625 *and Evolution*, 2, 57-64.  
626

- 627 Eguchi, K., Bui, T. V., & Yamane, S. (2004). A preliminary study on foraging distance and  
628 nesting sites of ants in Indo-Chinese lowland vegetation. *Sociobiology*, 43, 445-457.  
629
- 630 Farji-Brener, A. G., Barrantes, G., & Ruggiero, A. (2004). Environmental rugosity, body size  
631 and access to food: a test of the size-grain hypothesis in tropical litter ants. *Oikos*, 104, 165-  
632 171.  
633
- 634 Flynn, D. F., Gogol-Prokurat, M., Nogeire, T., Molinari, N., Richers, B. T., Lin, B. B., ... &  
635 DeClerck, F. (2009). Loss of functional diversity under land use intensification across  
636 multiple taxa. *Ecology Letters*, 12, 22-33.  
637
- 638 Ford, E. B. (1957). Polymorphism in plants, animals and man. *Nature*, 180, 1315-1319.  
639
- 640 Gagic, V., Bartomeus, I., Jonsson, T., Taylor, A., Winqvist, C., Fischer, C., ... & Tschamtké,  
641 T. (2015). Functional identity and diversity of animals predict ecosystem functioning better  
642 than species-based indices. *Proceedings of the Royal Society B: Biological Sciences*, 282,  
643 20142620.  
644
- 645 González-Suárez, M., Bacher, S., & Jeschke, J. M. (2015). Intraspecific trait variation is  
646 correlated with establishment success of alien mammals. *The American Naturalist*, 185, 737-  
647 746.  
648
- 649 Grevé, M. E., Bláha, S., Teuber, J., Rothmaier, M., & Feldhaar, H. (2019). The effect of  
650 ground surface rugosity on ant running speed is species-specific rather than size dependent.  
651 *Insectes Sociaux*. doi.org/10.1007/s00040-019-00694-z

652

653 Guénard, B., Weiser, M., Gomez, K., Narula, N., & Economo, E.P. (2017). The Global Ant

654 Biodiversity Informatics (GABI) database: a synthesis of ant species geographic

655 distributions. *Myrmecological News*, 24, 83-89.

656

657 Human, K. G., & Gordon, D. M. (1997). Effects of Argentine ants on invertebrate

658 biodiversity in northern California. *Conservation Biology*, 11, 1242-1248.

659

660 Isbell, F., Cowles, J., Dee, L. E., Loreau, M., Reich, P. B., Gonzalez, A., ... & Schmid, B.

661 (2018). Quantifying effects of biodiversity on ecosystem functioning across times and places.

662 *Ecology Letters*, 21, 763-778.

663

664 Keller, R. A., Peeters, C., & Beldade, P. (2014). Evolution of thorax architecture in ant castes

665 highlights trade-off between flight and ground behaviors. *Elife*, 3, e01539.

666

667 Laliberté, E., Legendre, P., & Shipley, B. (2014). FD: measuring functional diversity from

668 multiple traits, and other tools for functional ecology. R package version 12.0.

669

670 Lessard, J. P., Fordyce, J. A., Gotelli, N. J., & Sanders, N. J. (2009). Invasive ants alter the

671 phylogenetic structure of ant communities. *Ecology*, 90, 2664-2669.

672

673 Lowe, S., Browne, M., Boudjelas, S., & De Poorter, M. (2000). 100 of the world's worst

674 invasive alien species: a selection from the global invasive species database. Auckland:

675 Invasive Species Specialist Group.

676

- 677 MacDougall, A. S., Gilbert, B., & Levine, J. M. (2009). Plant invasions and the niche.  
678 *Journal of Ecology*, 97, 609-615.  
679
- 680 McGill, B. J., Enquist, B. J., Weiher, E., & Westoby, M. (2006). Rebuilding community  
681 ecology from functional traits. *Trends in Ecology and Evolution*, 21, 178-185.  
682
- 683 Morgan, B., & Guénard, B. (2019). Local models reveal greater spatial variation than global  
684 grids in an urban mosaic: Hong Kong climate, vegetation, and topography rasters. *Earth  
685 System Science Data Discussion*. doi.org/10.5194/essd-2018-132 (preprint).  
686
- 687 Mouchet, M. A., Villéger, S., Mason, N. W., & Mouillot, D. (2010). Functional diversity  
688 measures: an overview of their redundancy and their ability to discriminate community  
689 assembly rules. *Functional Ecology*, 24, 867-876.  
690
- 691 Mouillot, D., Graham, N. A., Villéger, S., Mason, N. W., & Bellwood, D. R. (2013). A  
692 functional approach reveals community responses to disturbances. *Trends in Ecology and  
693 Evolution*, 28, 167-177.  
694
- 695 Passera, L. (1984). *L'organisation sociale des Fourmis*. Toulouse: Privat.  
696
- 697 Porter, S. D., & Savignano, D. A. (1990). Invasion of polygyne fire ants decimates native  
698 ants and disrupts arthropod community. *Ecology*, 71, 2095-2106.  
699
- 700 Pyšek, P., & Richardson, D. M. (2010). Invasive species, environmental change and  
701 management, and health. *Annual Review of Environment and Resources*, 35, 25-55.



702

703 R Core Team. (2017). R: a language and environment for statistical computing. R.

704

705 Richter, A., Keller, R. A., Rosumek, F. B., Economo, E. P., Garcia, F. H., & Beutel, R. G.

706 (2019). The cephalic anatomy of workers of the ant species *Wasmannia affinis* (Formicidae,

707 Hymenoptera, Insecta) and its evolutionary implications. *Arthropod Structure and*

708 *Development*, 49, 26-49.

709

710 Schofield, S. F., Bishop, T. R., & Parr, C. L. (2016). Morphological characteristics of ant

711 assemblages (Hymenoptera: Formicidae) differ among contrasting biomes. *Myrmecological*

712 *News*, 23, 129-137.

713

714 Silva, R. R., & Brandão, C. R. F. (2010). Morphological patterns and community

715 organization in leaf-litter ant assemblages. *Ecological Monographs*, 80, 107-124.

716

717 Swenson, N. G. (2014). *Functional and phylogenetic ecology in R*. New York, NY: Springer.

718

719 Tschinkel, W. R. (1988). Colony growth and the ontogeny of worker polymorphism in the

720 fire ant, *Solenopsis invicta*. *Behavioral Ecology and Sociobiology*, 22, 103-115.

721

722 Tschinkel, W. R. (2006). *The fire ants*. Cambridge, MA: Harvard University Press.

723

724 Vellend, M. (2016). *The theory of ecological communities*. New Jersey, NJ: Princeton

725 University Press.

726

- 727 Venables, W. N., & Ripley, B. D. (2002). Modern applied statistics with S. New York, NY:  
728 Springer.  
729
- 730 Villéger, S., Grenouillet, G., & Brosse, S. (2014). Functional homogenization exceeds  
731 taxonomic homogenization among European fish assemblages. *Global Ecology and*  
732 *Biogeography*, 23, 1450-1460.  
733
- 734 Vinson, S. B. (1997). Invasion of the red imported fire ant (Hymenoptera: Formicidae):  
735 spread, biology, and impact. *American Entomologist*, 43(1), 23-39.  
736
- 737 Wang, L., Xu, Y., Zeng, L., & Lu, Y. (2018). A review of the impact of the red imported fire  
738 ant *Solenopsis invicta* Buren on biodiversity in South China. *Journal of Integrative*  
739 *Agriculture*, 17: 60345-60347  
740
- 741 Weeks, R. D., Wilson, L. T., & Vinson, S. B. (2004). Resource partitioning among colonies  
742 of polygyne red imported fire ants (Hymenoptera: Formicidae). *Environmental Entomology*,  
743 33, 1602-1608.  
744
- 745 Wickham, H. (2009). *ggplot2: elegant graphics for data analysis*. New York, NY: Springer-  
746 Verlag.  
747
- 748 Wilson, E. O. (2003). *Pheidole* in the New World: a dominant, hyperdiverse ant genus.  
749 Cambridge, MA: Harvard University Press.  
750

751 Wong, M. K. L., Guénard, B., & Lewis, O. T. (2018). Trait-based ecology of terrestrial  
752 arthropods. *Biological Reviews*. doi.org/10.1111/brv.12488  
753
